# Supplementary material for: Transcriptomic Profiling Reveals an Enhancer RNA Signature for Recurrence Prediction in Colorectal Cancer
Source: MDPI journal article supplement (doi:10.3390/genes14010137), 2023-01-03
Supplement: s1 [file s1]

# **Transcriptomic profiling reveals an enhancer RNA signature for recurrence prediction in colorectal cancer**

Divya Sahu<sup>1,2</sup>, Chen-Ching Lin<sup>3</sup>, Ajay Goel<sup>1,\*</sup>

<sup>1</sup>Department of Molecular Diagnostics and Experimental Therapeutics, Beckman Research Institute of City of Hope Comprehensive Center, 1218 S. Fifth Avenue, Biomedical Research Center, Monrovia, California 91016, USA

<sup>2</sup>Department of Genetics, University of Alabama at Birmingham, Birmingham, AL, 35294, USA

<sup>3</sup>Institute of Biomedical Informatics, National Yang Ming Chiao Tung University, Taipei, 11221, Taiwan

**\*Correspondence:** [ajgoel@coh.org](mailto:ajgoel@coh.org); Tel.: +1-626-218-3452

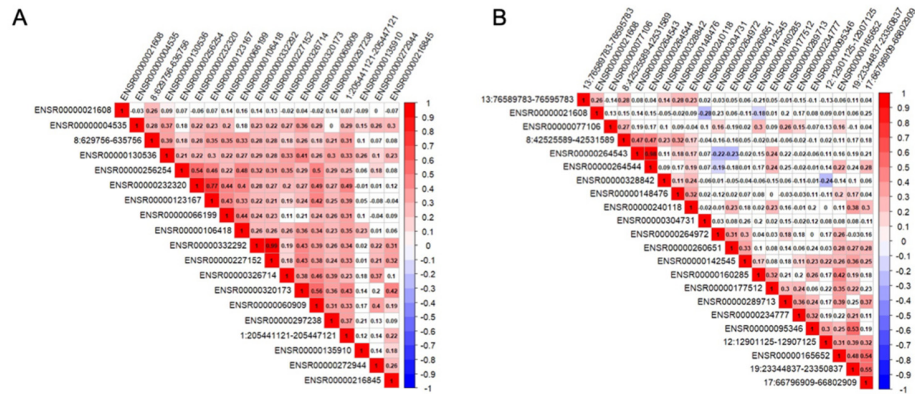

**Figure S3:** Spearman correlation analysis of the enhancer RNA signature (eRNA). Corrplot of eRNA expression levels measured by RNA-seq in **(A)** colon cancer; 22 eRNAs **(B)** rectal cancer; 19 eRNAs. The scale bar denotes correlation strength, with 1 indicating positive correlation (red) and -1 indicating negative correlation (blue). Only eRNA *ENSR00000021608* was observed in common between colon cancer and rectal cancer.
