# Supplementary material for: Transcriptomic Profiling Reveals an Enhancer RNA Signature for Recurrence Prediction in Colorectal Cancer
Source: MDPI journal article supplement (doi:10.3390/genes14010137), 2023-01-03
Supplement: s1 [file s1]

# **Transcriptomic profiling reveals an enhancer RNA signature for recurrence prediction in colorectal cancer**

Divya Sahu<sup>1,2</sup>, Chen-Ching Lin<sup>3</sup>, Ajay Goel<sup>1,\*</sup>

<sup>1</sup>Department of Molecular Diagnostics and Experimental Therapeutics, Beckman Research Institute of City of Hope Comprehensive Center, 1218 S. Fifth Avenue, Biomedical Research Center, Monrovia, California 91016, USA

<sup>2</sup>Department of Genetics, University of Alabama at Birmingham, Birmingham, AL, 35294, USA

<sup>3</sup>Institute of Biomedical Informatics, National Yang Ming Chiao Tung University, Taipei, 11221, Taiwan

**\*Correspondence:** [ajgoel@coh.org](mailto:ajgoel@coh.org); Tel.: +1-626-218-3452

**Table S1:** Clinical characteristics of TCGA colorectal cancer patients in the entire cohort, training cohort and testing cohort.

| Subgroup                  | Entire cohort | Training cohort | Testing cohort |
|---------------------------|---------------|-----------------|----------------|
| <b>Colon Cancer</b>       |               |                 |                |
| <b>Number of patients</b> | 96            | 48              | 48             |
|                           |               |                 |                |
| <b>Age (years)</b>        |               |                 |                |
| Median                    | 65            | 66.5            | 64             |
| Range                     | (34-90)       | (40-86)         | (34-90)        |
|                           |               |                 |                |
| <b>Tumor Stage</b>        |               |                 |                |
| I and II                  | 52            | 22              | 30             |
| III                       | 42            | 24              | 18             |
|                           |               |                 |                |
| <b>Gender</b>             |               |                 |                |
| Female                    | 43            | 19              | 24             |
| Male                      | 53            | 29              | 24             |
|                           |               |                 |                |
| <b>Rectal Cancer</b>      |               |                 |                |
| <b>Number of patients</b> | 121           | 60              | 61             |
|                           |               |                 |                |
| <b>Age (years)</b>        |               |                 |                |
| Median                    | 64            | 64.5            | 64             |
| Range                     | (31-90)       | (33-90)         | (31-86)        |
|                           |               |                 |                |
| <b>Tumor Stage</b>        |               |                 |                |
| I and II                  | 73            | 35              | 38             |
| III                       | 42            | 22              | 20             |
|                           |               |                 |                |
| <b>Gender</b>             |               |                 |                |
| Female                    | 54            | 29              | 25             |
| Male                      | 67            | 31              | 36             |
