# Supplementary material for: Transcriptomic Profiling Reveals an Enhancer RNA Signature for Recurrence Prediction in Colorectal Cancer
Source: MDPI journal article supplement (doi:10.3390/genes14010137), 2023-01-03
Supplement: s1 [file s1]

# **Transcriptomic profiling reveals an enhancer RNA signature for recurrence prediction in colorectal cancer**

Divya Sahu<sup>1,2</sup>, Chen-Ching Lin<sup>3</sup>, Ajay Goel<sup>1,\*</sup>

<sup>1</sup>Department of Molecular Diagnostics and Experimental Therapeutics, Beckman Research Institute of City of Hope Comprehensive Center, 1218 S. Fifth Avenue, Biomedical Research Center, Monrovia, California 91016, USA

<sup>2</sup>Department of Genetics, University of Alabama at Birmingham, Birmingham, AL, 35294, USA

<sup>3</sup>Institute of Biomedical Informatics, National Yang Ming Chiao Tung University, Taipei, 11221, Taiwan

**\*Correspondence:** [ajgoel@coh.org](mailto:ajgoel@coh.org); Tel.: +1-626-218-3452

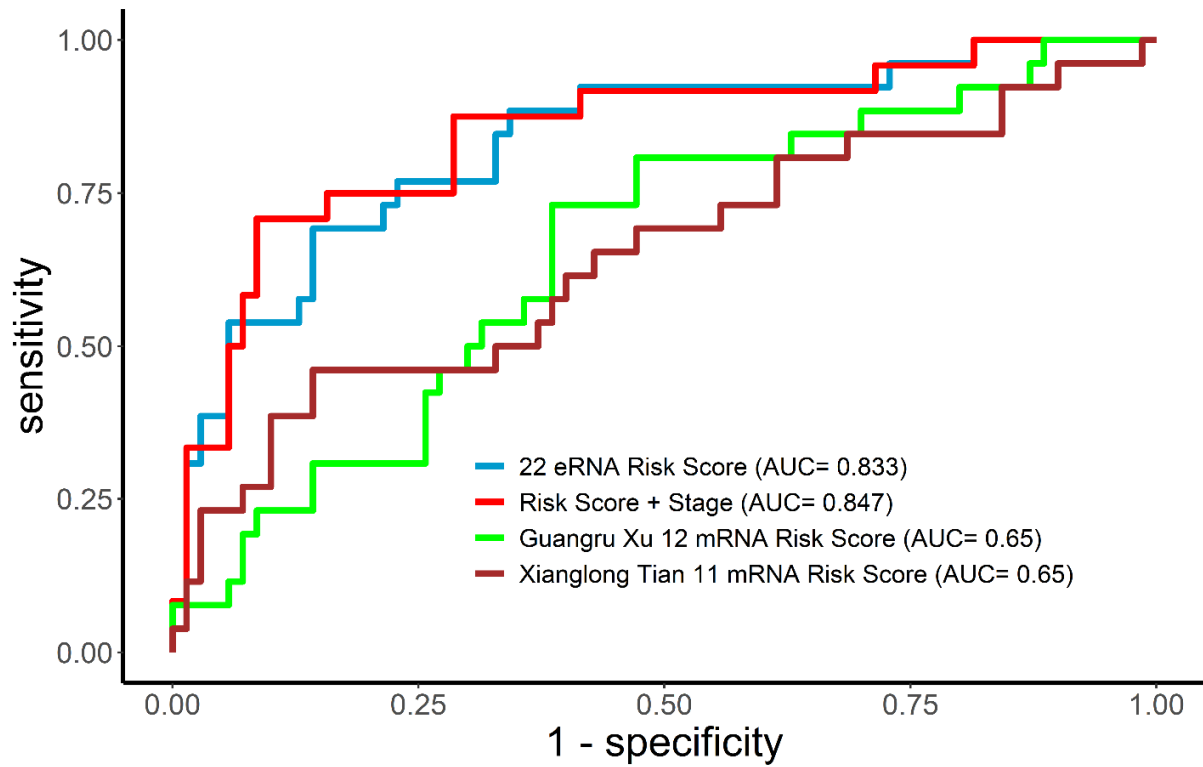

**Figure S2:** Receiver operating characteristics curve analyses of colon cancer recurrence prediction by the enhancer RNA signature and protein-coding gene signature. AUC=area under the curve.
